# Supplementary material for: Easy Access to a Cyclic Key Intermediate for the Synthesis of Trisporic Acids and Related Compounds
Source: MDPI journal article supplement (doi:10.3390/molecules19021748), 2014-02-03

## Supporting Information

### **<sup>1</sup>H- and <sup>13</sup>C-NMR spectra for Compounds 4–9**

|                              |    |
|------------------------------|----|
| Compound <b>4</b>            | S2 |
| Compound <b>5</b>            | S3 |
| Compound <b>6</b>            | S4 |
| Compound <b>7</b>            | S5 |
| Compound <b>8</b>            | S6 |
| Compound <b>9</b>            | S7 |
| NOE Experiments for <b>9</b> | S8 |

Figure S1.  $^1\text{H}$  and  $^{13}\text{C}$  spectra for **4**.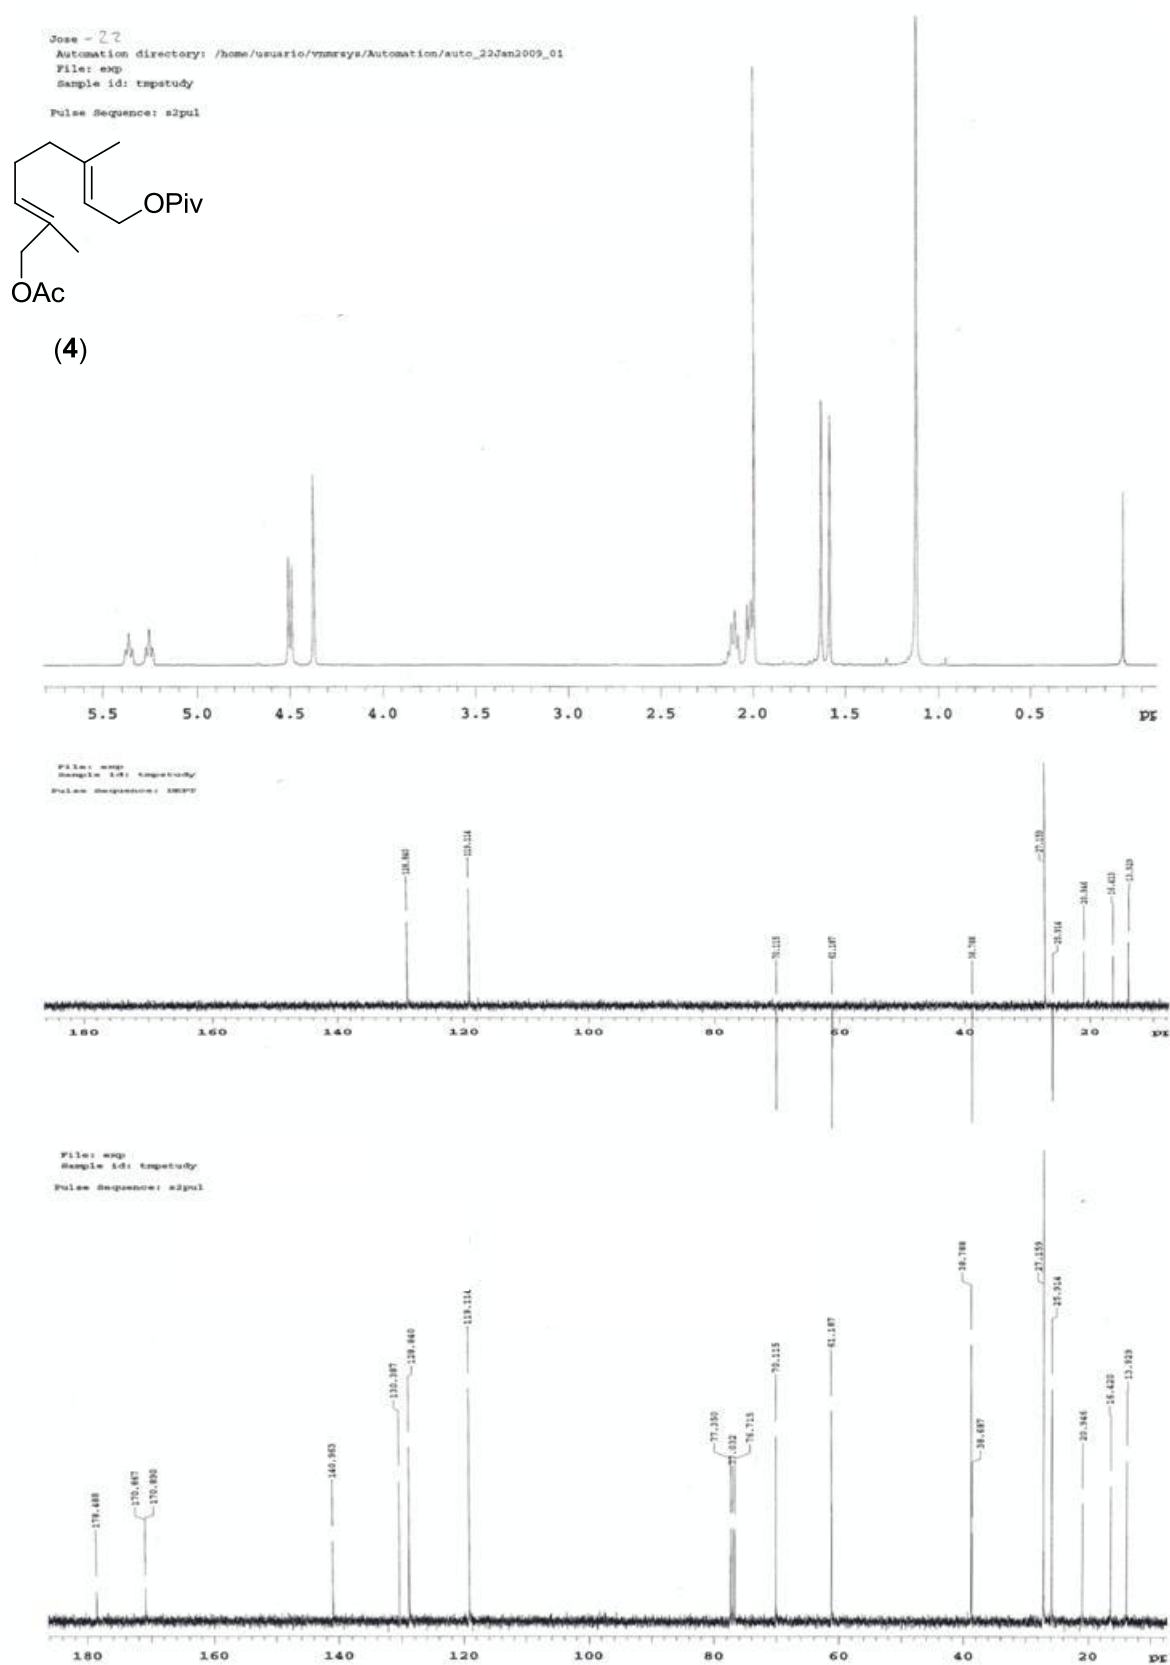

Figure S2.  $^1\text{H}$  and  $^{13}\text{C}$  spectra for **5**.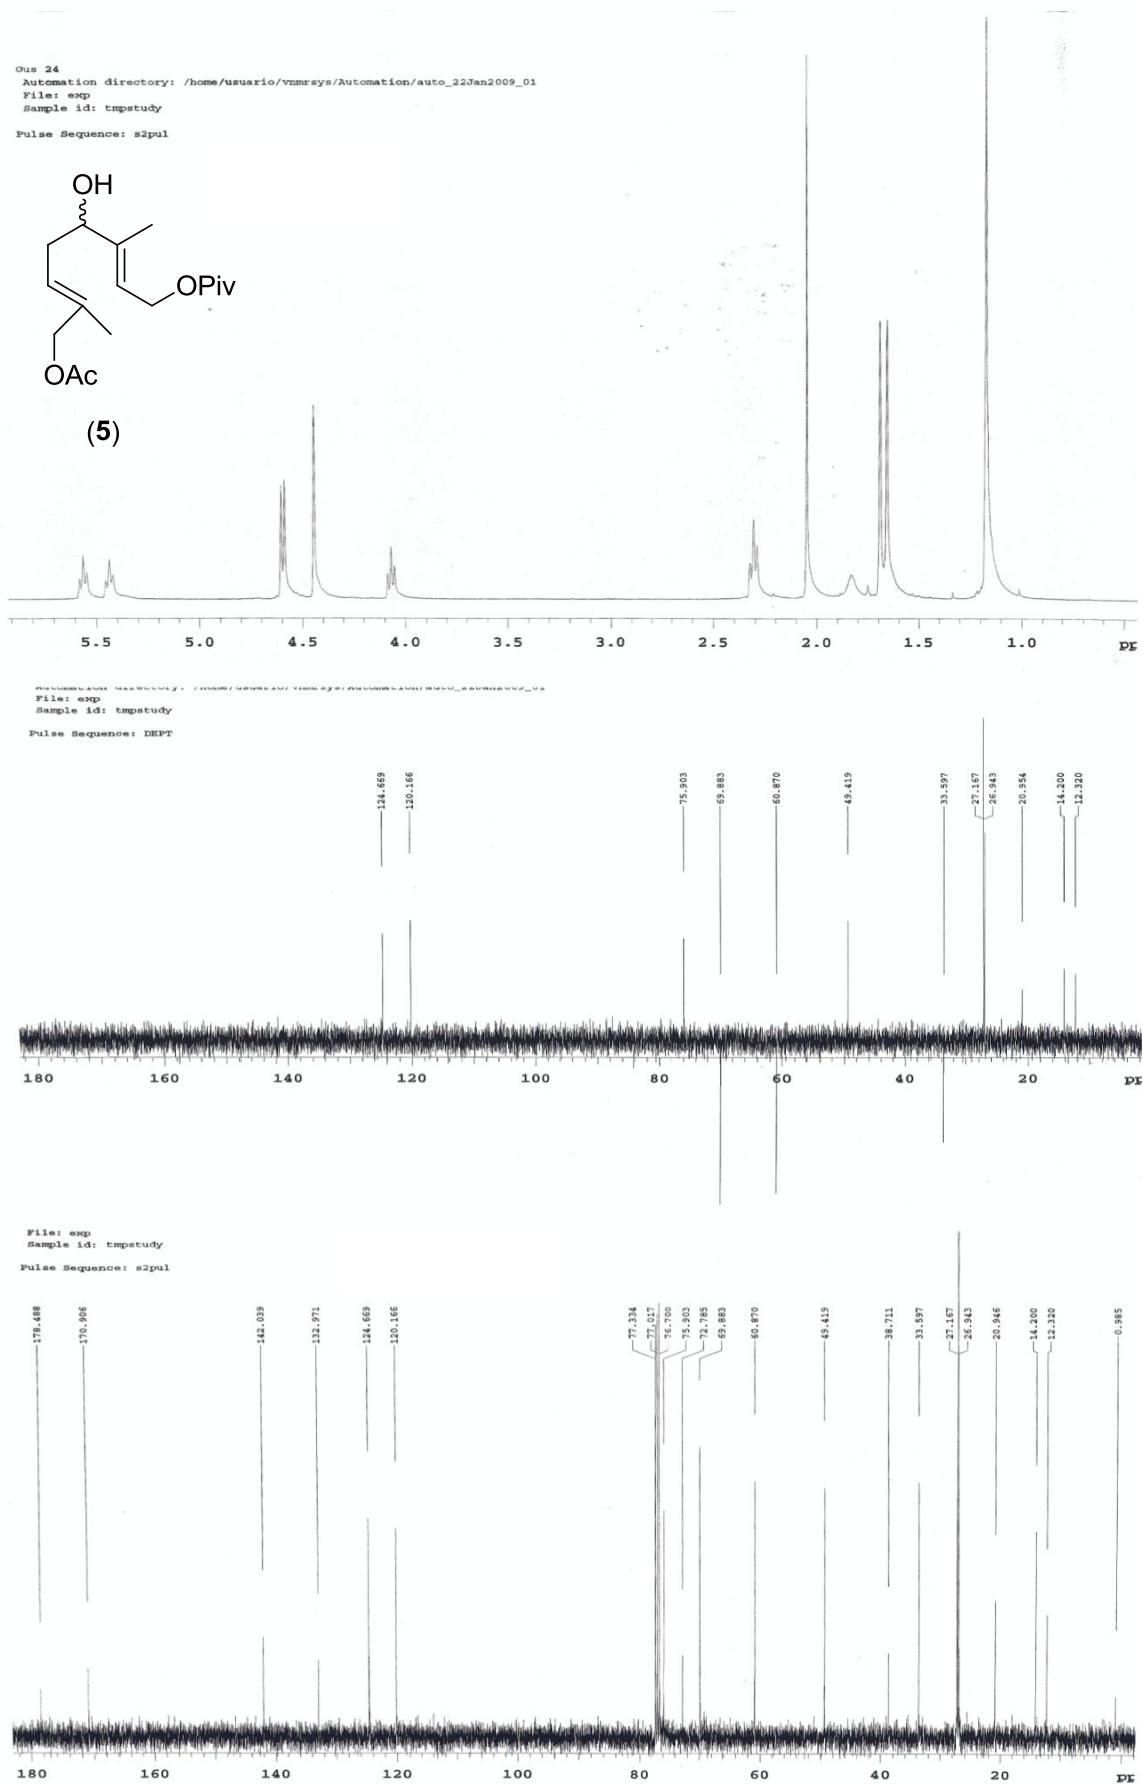

Figure S3.  $^1\text{H}$  and  $^{13}\text{C}$  spectra for 6.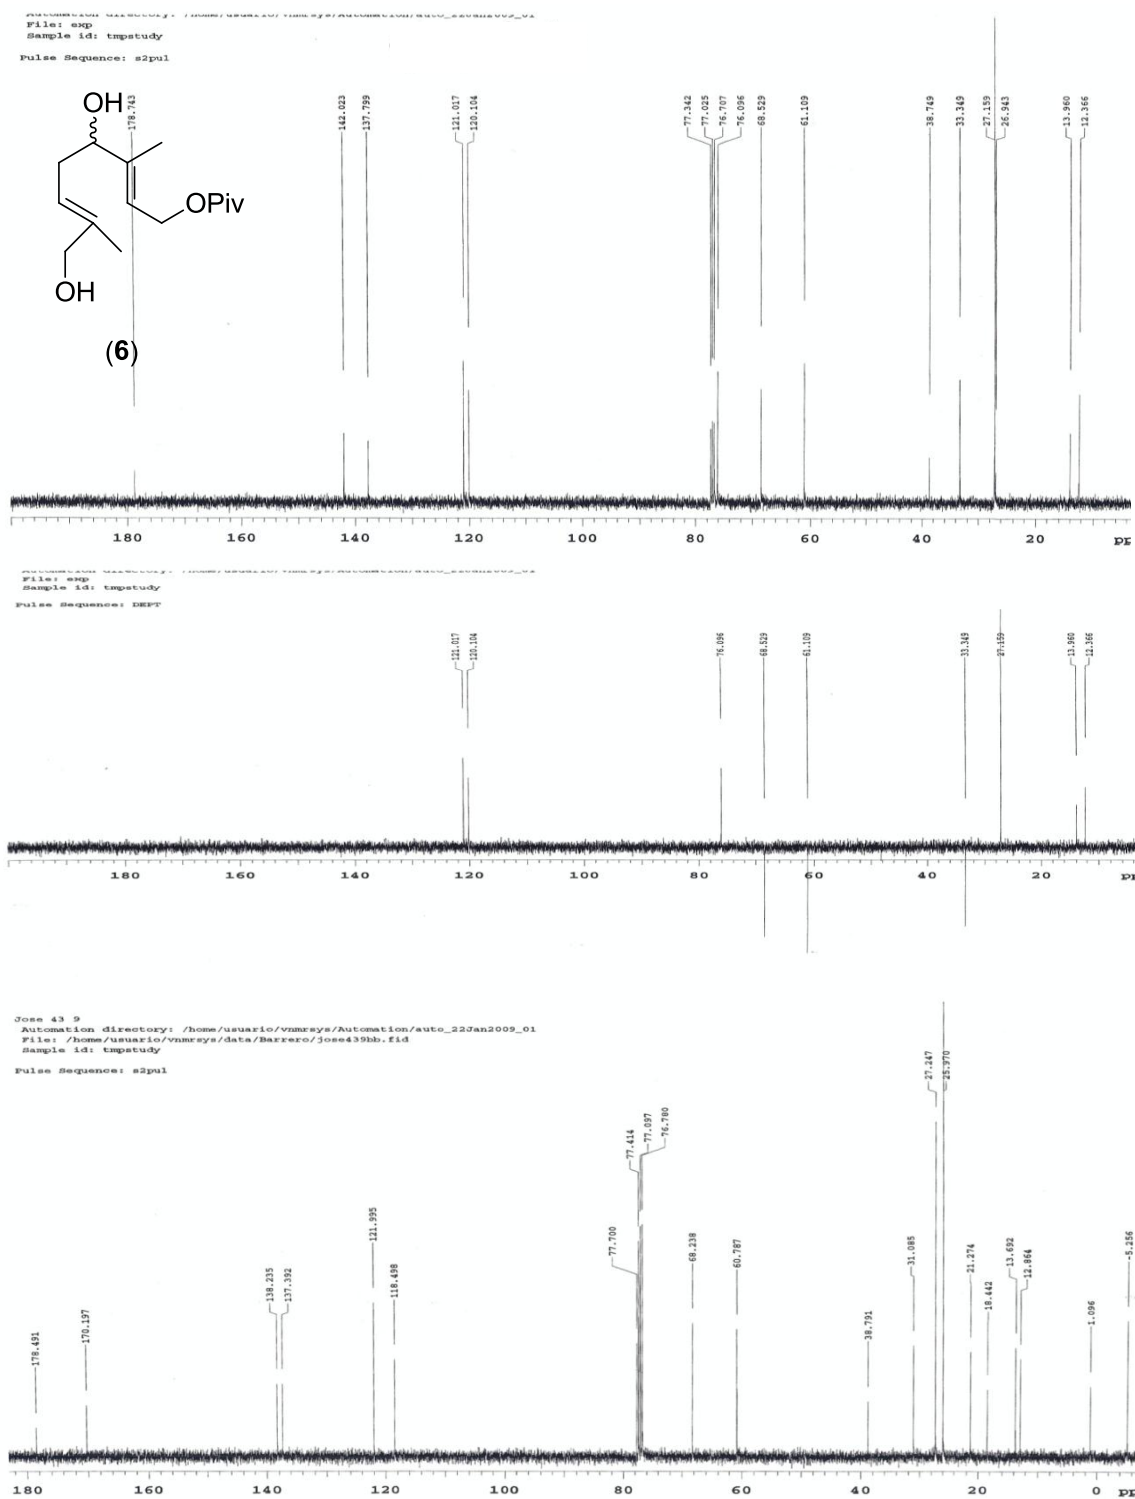

Figure S4.  $^1\text{H}$  and  $^{13}\text{C}$  spectra for 7.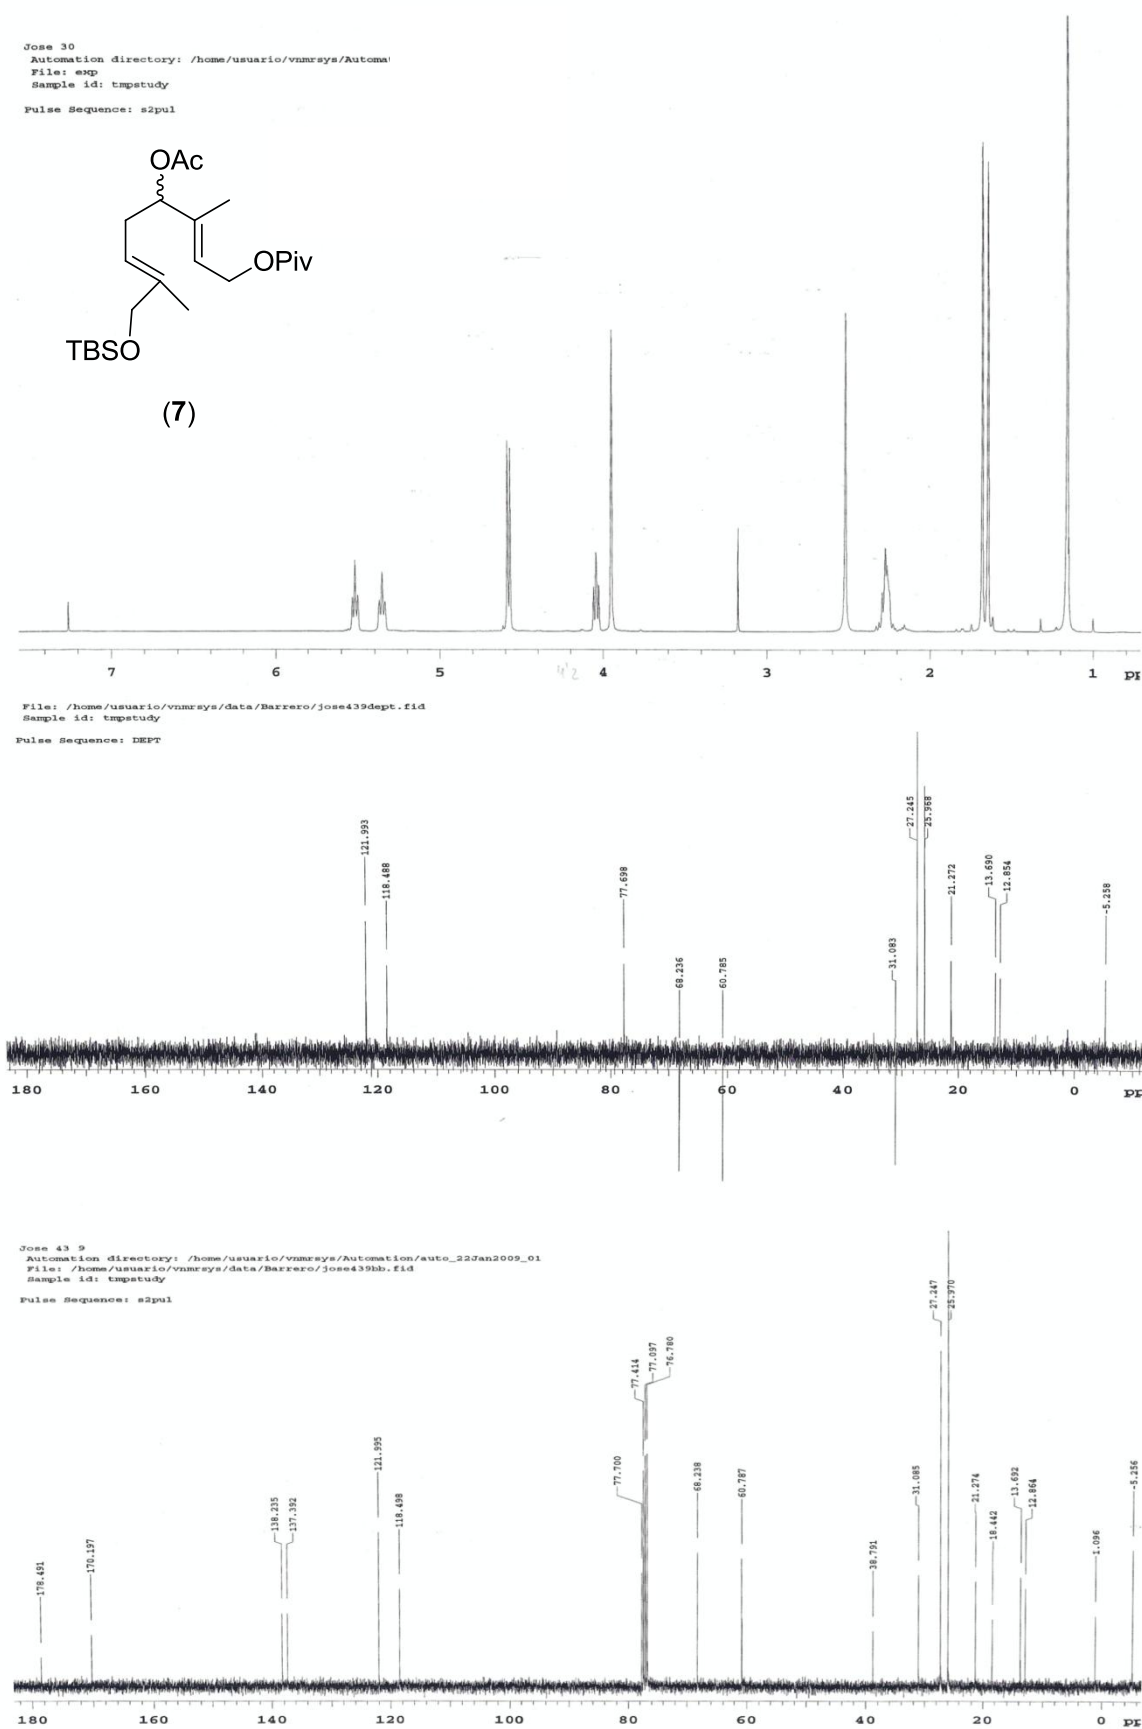

Figure S5.  $^1\text{H}$  and  $^{13}\text{C}$  spectra for **8**.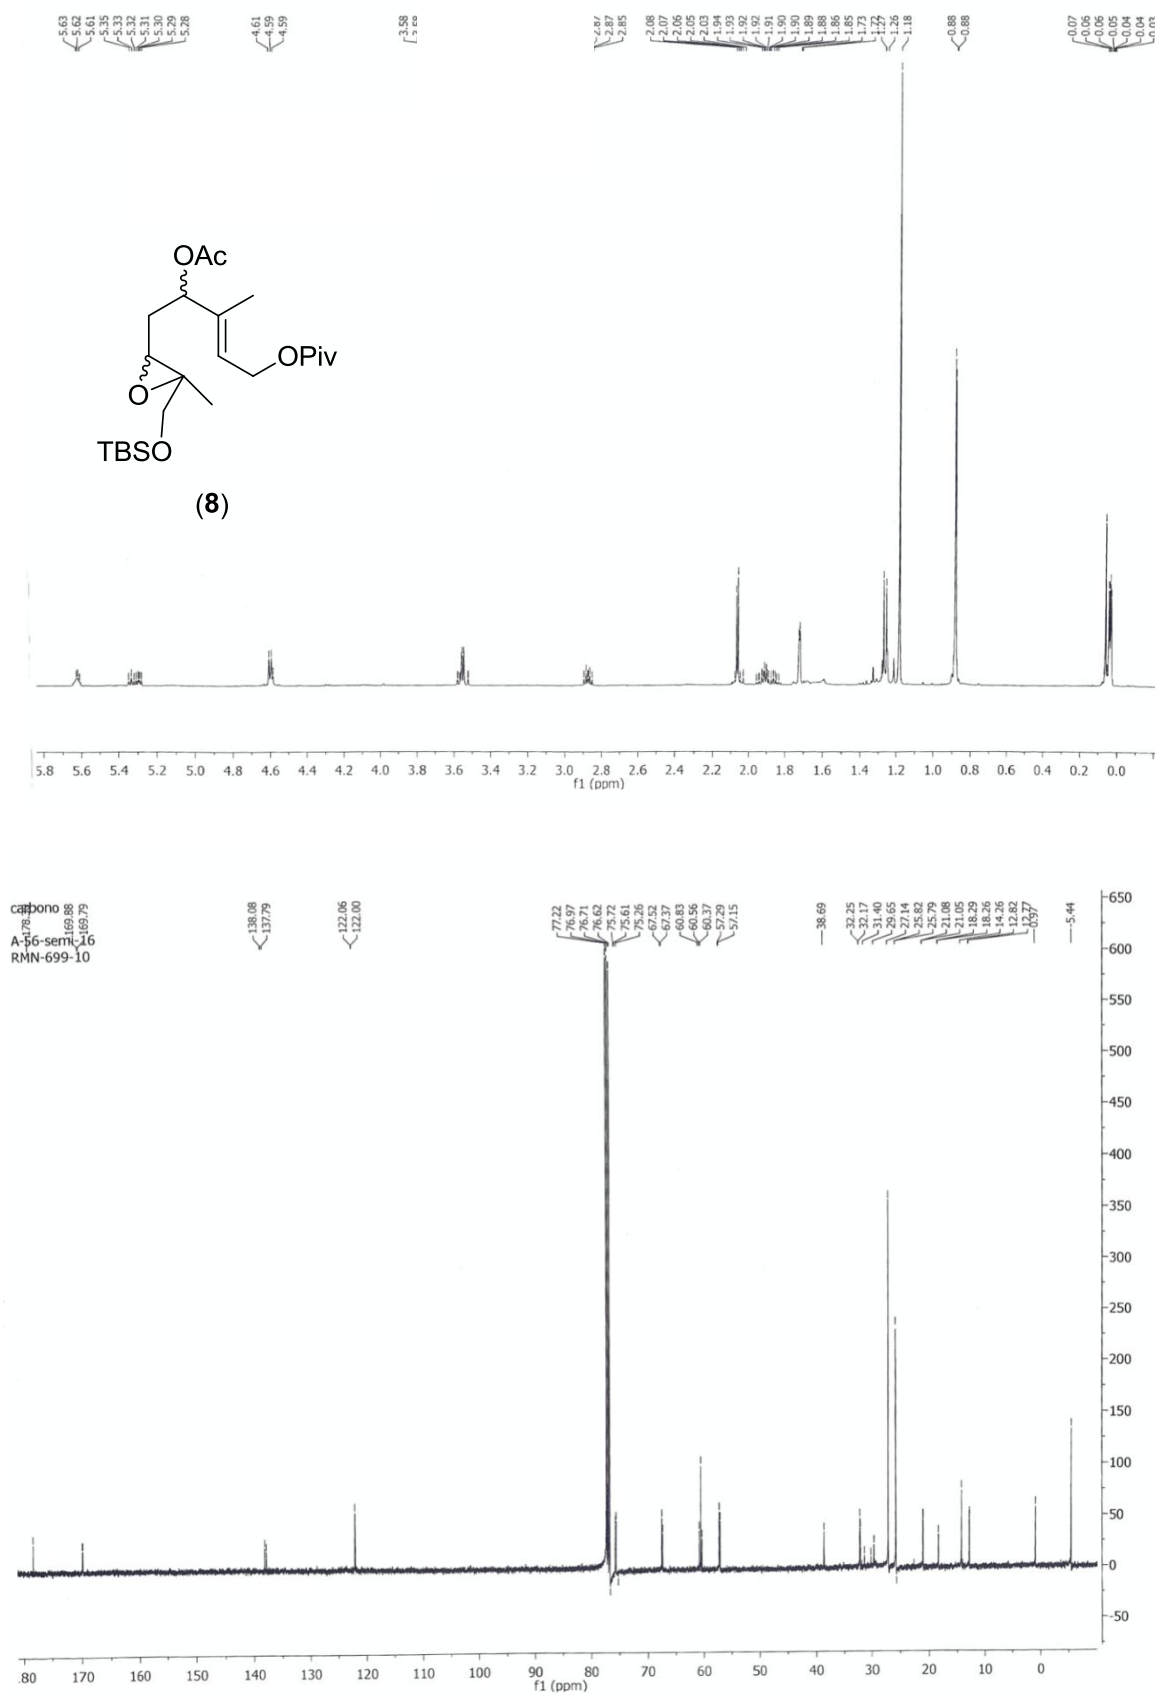

Figure S6.  $^1\text{H}$  and  $^{13}\text{C}$  spectra for **9**.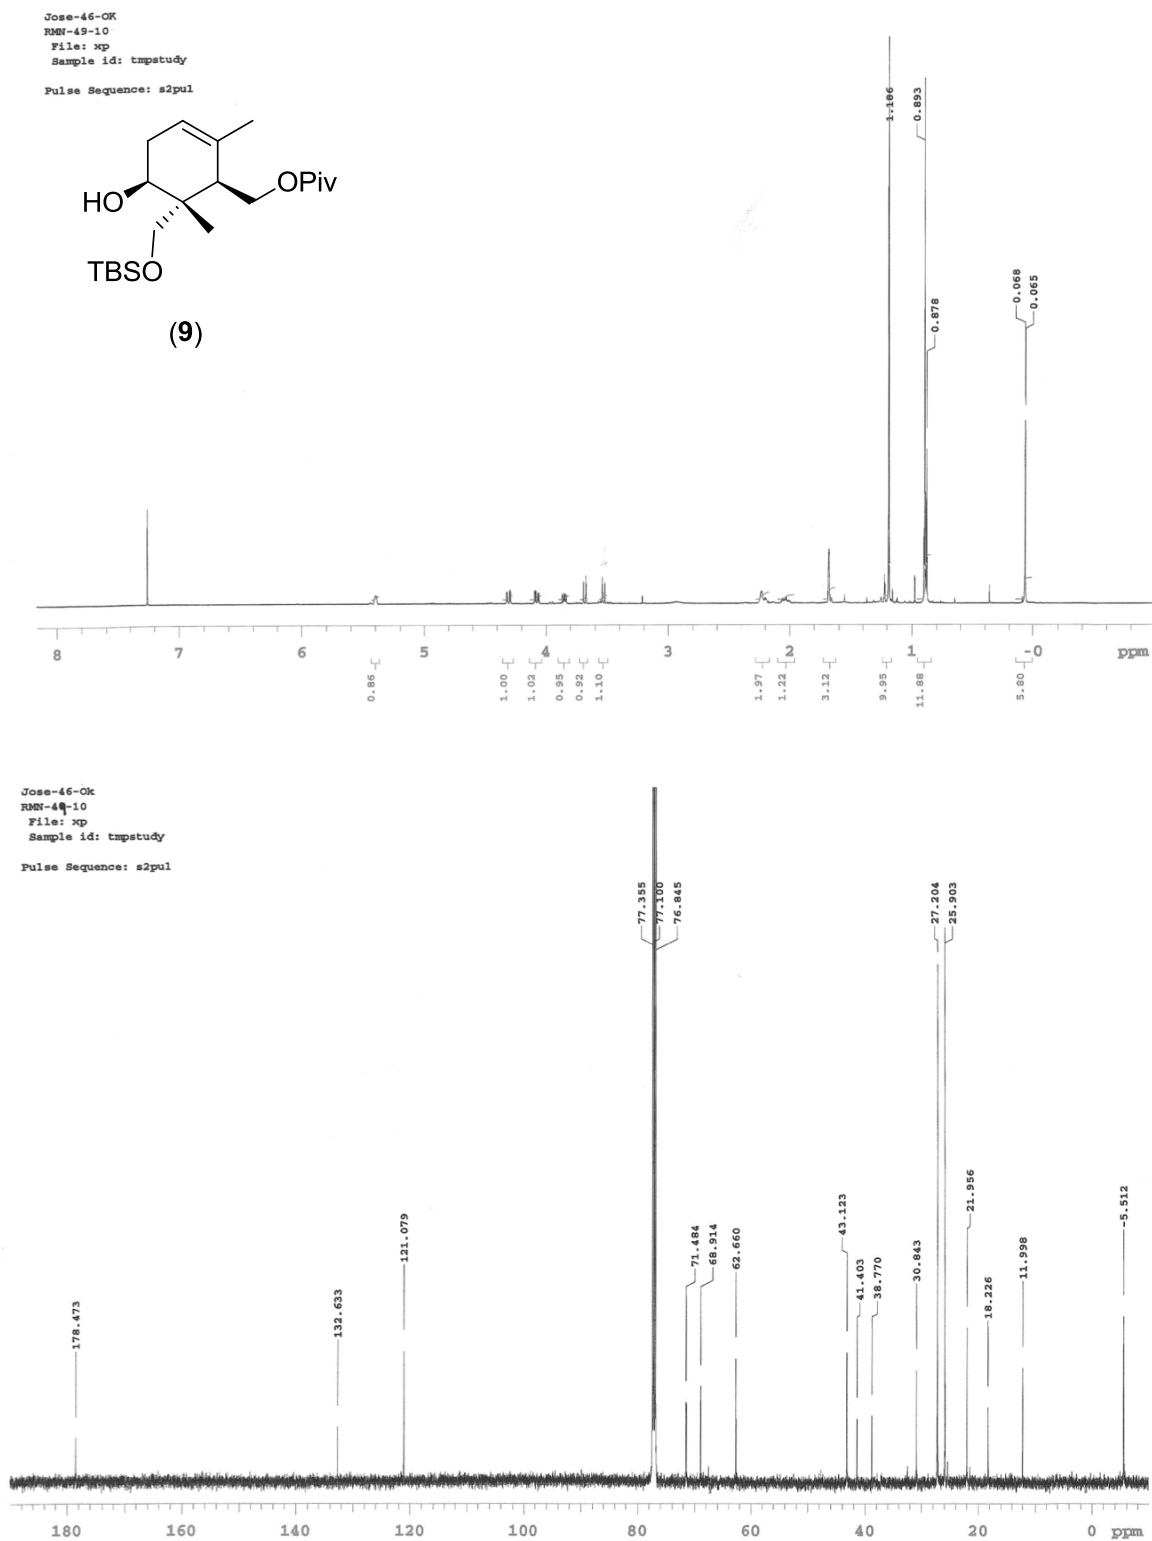

Figure S6. Cont.

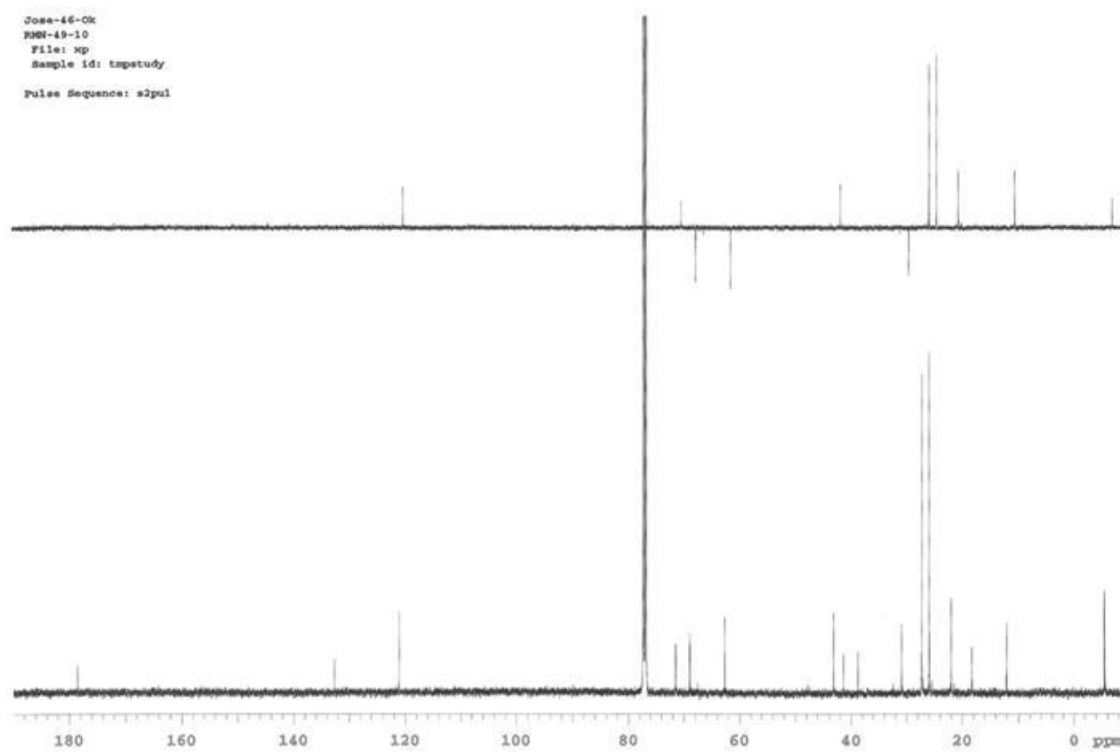

## NOE Experiments for 9

Figure S7. Representative NOE experiment for 9.

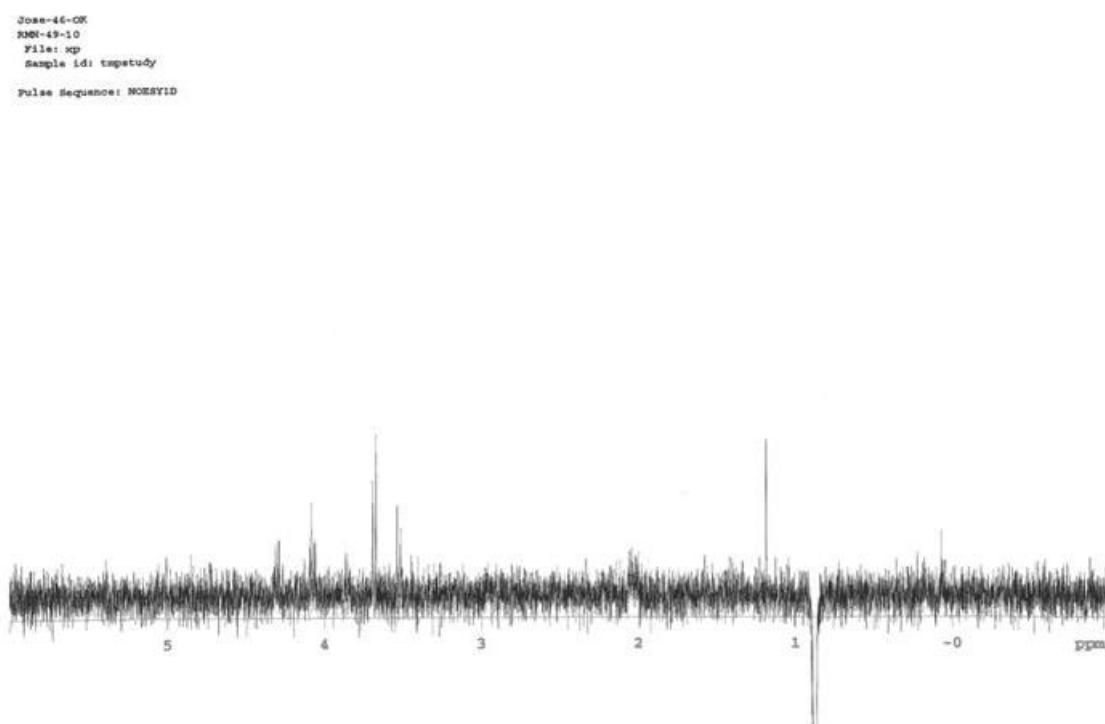



Figure S7. Cont.

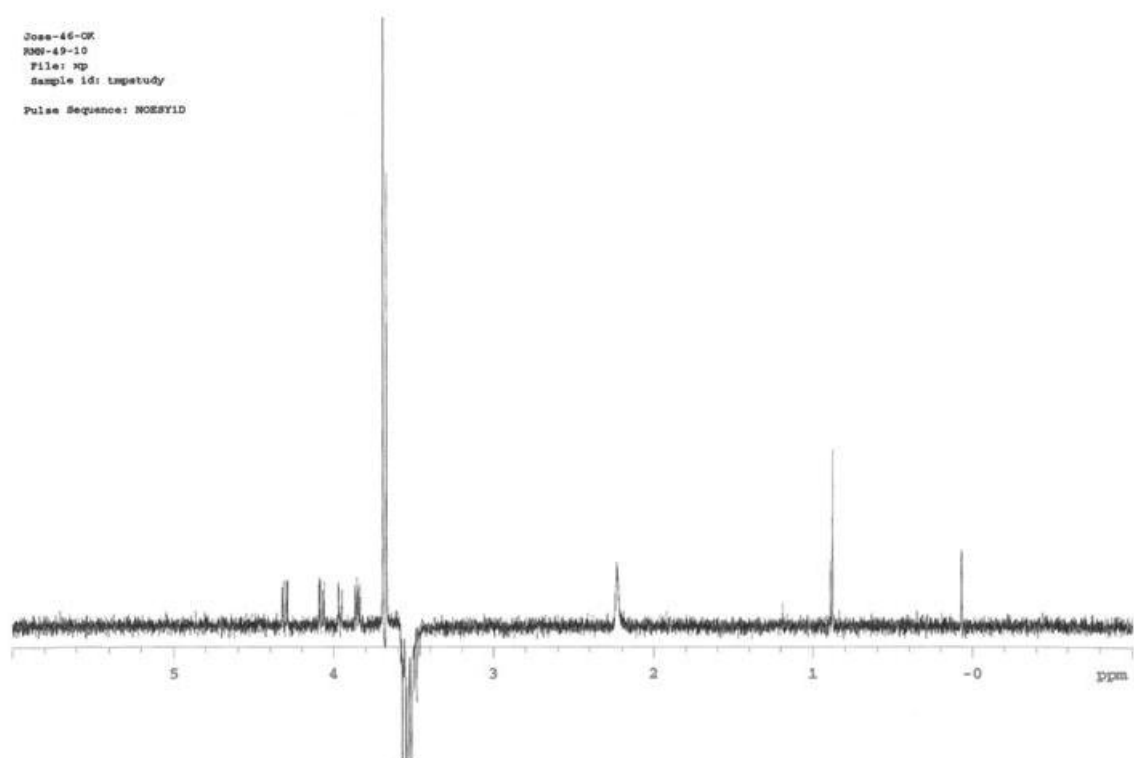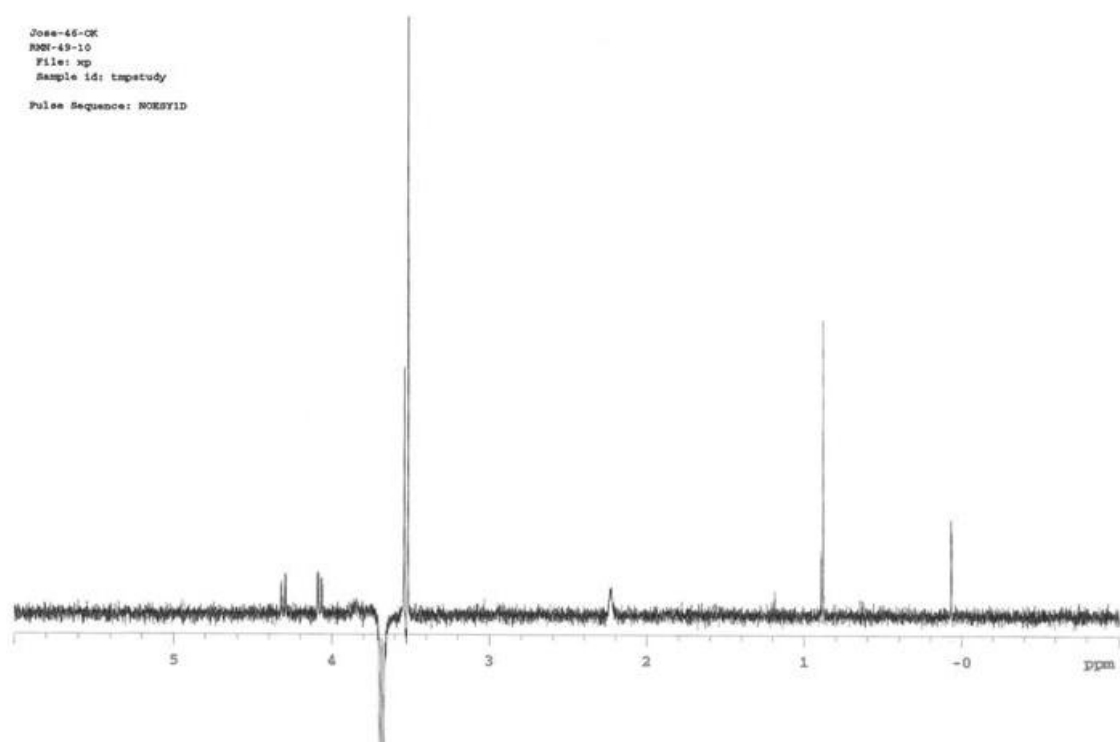

Figure S7. Cont.

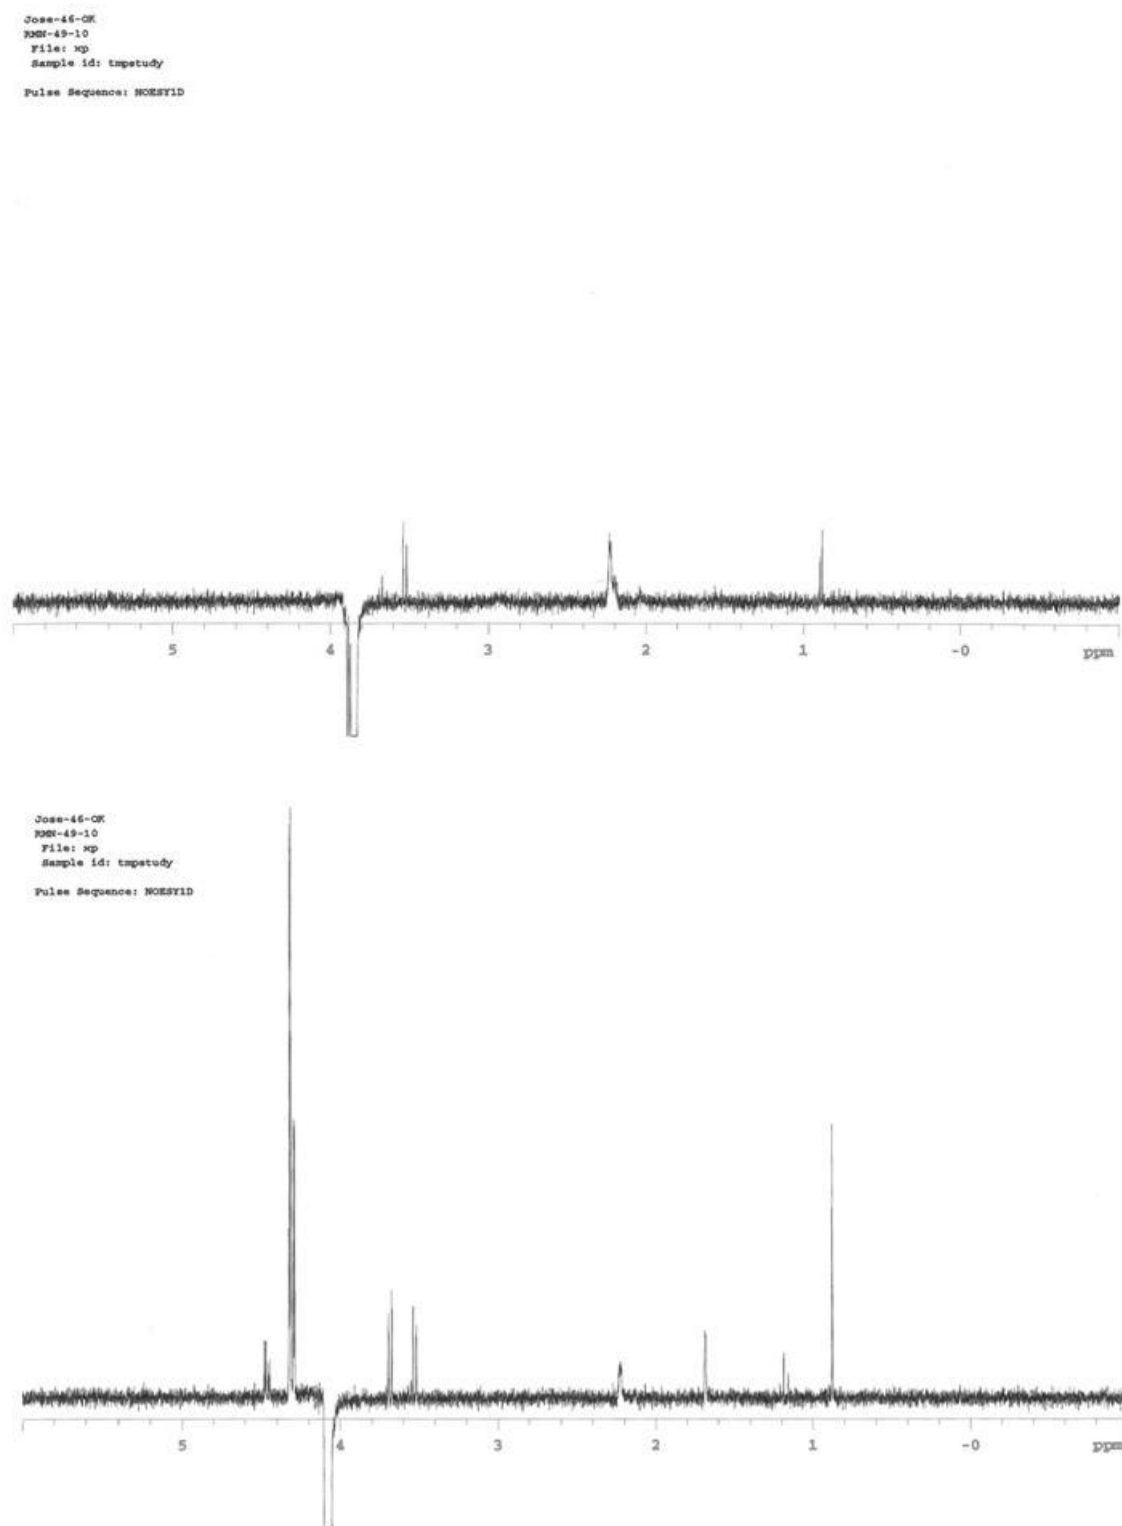

Supplement: s1 [file s1]
